# 1 **Universal metabarcoding of pico- to mesoplankton reveals seasonal** 2 **dynamics and a bacterial bloom**

3

4 Christian Wurzbacher<sup>1, 2, 3</sup>, Katrin Attermeyer<sup>2, 4</sup>, Marie Therese Kettner<sup>2</sup>, Clara

5 Flintrop<sup>3</sup>, Norman Warthmann<sup>3, 5, 6</sup>, Sabine Hilt<sup>6</sup>, Hans-Peter Grossart<sup>2, 7</sup>, Michael

6 T. Monaghan<sup>3, 6</sup>

7

81 University of Gothenburg, Department of Biological and Environmental Sciences, Box 461,  
940530 Göteborg, Sweden

102 Leibniz-Institute of Freshwater Ecology and Inland Fisheries, Alte Fischerhütte 2, 16775

11 Stechlin, Germany

123 Berlin Center for Genomics in Biodiversity Research, Königin-Luise-Str. 6-8, 14195 Berlin,

13 Germany

144 Uppsala University, Department of Ecology and Genetics, Limnology, Norbyvägen 18D, 75236

15 Uppsala, Sweden

165 The Australian National University, Research School of Biology, Linnaeus Way, Canberra, ACT

17 2601, Australia

186 Leibniz-Institute of Freshwater Ecology and Inland Fisheries, Müggelseedamm 301, 12587

19 Berlin, Germany

207 Potsdam University, Institute of Biochemistry and Biology, Maulbeerallee 2, 14469 Potsdam,

21 Germany

22

23 Corresponding authors: Christian Wurzbacher ([christian@wurzbacher.cc](mailto:christian@wurzbacher.cc)), Katrin

24 Attermeyer ([katrin.attermeyer@ebc.uu.se](mailto:katrin.attermeyer@ebc.uu.se))

25

26 The authors declare no conflict of interest

## 27 **Abstract**

28 Most studies of biodiversity focus on either macroscopic or microbial  
29 communities, with little or no simultaneous study of eukaryotes and  
30 prokaryotes. We tested whether a universal metabarcoding approach could be  
31 used to study the total diversity and temporal dynamics of aquatic pico- to  
32 mesoplankton communities in a shallow temperate lake. The approach  
33 revealed significant changes in the relative abundance of eukaryotic and  
34 prokaryotic plankton communities over a period of three months. These  
35 patterns, based on sequencing reads, fit with counts using traditional methods.  
36 We also witnessed the bloom of a conditionally rare bacterial taxon belonging  
37 to *Arcicella*, a genus that has been largely overlooked in freshwaters. Our data  
38 demonstrate the potential of universal metabarcoding as a complement to  
39 traditional studies of plankton communities, and for long-term monitoring  
40 across a broad range of organisms.

41

## 42 **Introduction**

43 Microbial communities play key roles in ecosystems and knowledge on their  
44 composition and dynamics is critical for understanding ecosystem functions  
45 and services. Recently, Barberán et al. (2014) emphasized the importance of  
46 studying microbial diversity as an integral part of total biodiversity. In aquatic  
47 ecosystems, plankton communities are a mixture of prokaryotes and  
48 eukaryotes of a wide range of sizes, and the traditional separation into size  
49 classes and domains, with their largely independent research disciplines,  
50 impairs a full integration of microbial communities into ecological concepts.  
51 Simultaneous studies of diversity of all three domains are rare (< 1% of all  
52 studies, SI1) in environmental sequencing surveys (e.g., Steele *et al.*, 2011,

53Lima-Mendez *et al.*, 2015) and size pre-selection steps are common in most  
54analyses. Nonetheless, bacterioplankton should exhibit temporal dynamics that  
55are similar to those of macroorganisms (Shade *et al.* 2013), suggesting that the  
56monitoring of temporal dynamics of all organisms has great potential for  
57identifying ecological interactions (Fuhrman *et al.*, 2015). In addition, metadata  
58on organismal ratios such as eukaryotes : prokaryotes or heterotrophs :  
59phototrophs could be useful for monitoring ecosystem changes. Here we used a  
60universal metabarcoding approach to simultaneously study the dynamics of  
61both prokaryotic and eukaryotic plankton (pico- to mesoplankton) in a lake that  
62exhibits pronounced seasonal plankton dynamics.

63

## 64**Methods**

65We applied universal metabarcoding to water samples of the eutrophic, shallow  
66temperate Lake Gollin (Kleiner Gollinsee) in northwestern Germany. Lake Gollin  
67was sampled monthly as part of a study of bacteria, phyto- and zooplankton  
68from April 2010 to December 2011 (Brothers *et al.*, 2013; see SI1 for  
69parameters and methods). Briefly, we took monthly samples in spring 2010  
70(April – June) from littoral water, pelagic water, and water above the pelagic  
71sediment. DNA was extracted from filters (0.22 µm Sterivex; Millipore,  
72Germany) using commercial kits and mechanical bead-beating. We used the V9  
73region of the ribosomal small subunit for taxa detection (Engelbrektson *et al.*,  
742010). Methodological discussions on a related integrative single marker can  
75be found in Parada *et al.* (2015). Amplicons were constructed and sequenced  
76following the conditions described for pyrosequencing by Hölker *et al.* (2015)  
77with the modification that we employed the AccuPrime High Fidelity Polymerase  
78(Invitrogen, Carlsbad, USA). Sequences were processed in Mothur (version

791.24.1; Schloss *et al.*, 2009) and classified with SINA aligner (version 1.2.11;  
80Pruesse *et al.*, 2012) against the SILVA SSU reference database (115 Ref NR 99,  
81www.arb-silva.de). After detection of a bacterial bloom (see below) we designed  
82a PCR test for *Arcicella* bacteria for the monthly samples. PCR products were  
83quantified by gel electrophoresis assigning them to four intensities.

84

## 85**Results & Discussion**

86There was a pronounced shift in dominance from mainly eukaryotes in April to  
87predominantly prokaryotes in June (Fig. 1a; SI2 for taxa browsing). This was  
88accompanied by an increased heterotrophs : phototrophs ratio (SI3). Archaea  
89were not abundant in Lake Gollin, despite their high abundance in some  
90meromictic lakes (Gies *et al.*, 2014). In the winter prior to our study, a  
91significant fish-kill led to a bloom of herbivorous ciliates in April 2010 that was  
92confirmed by our data (Fig. 1d). This likely exerted a very high grazing pressure  
93upon the small plankton (<5 µm; Lischke *et al.*, 2016). Potentially, the abrupt  
94disappearance of ciliates in May – June (Fig. 1d) following increasing crustacean  
95abundances (Hilt *et al.*, 2015) reduced the abundance of algae and bacterial  
96grazers. This may have opened a niche for the detected bacteria, in particular  
97of the genera *Arcicella* and *Variovorax* (see below). Our molecular data  
98complement traditional counting data, following the trend of the sum  
99parameters of phyto-, zoo- and bacterioplankton (SI3). The approach may  
100therefore have the potential to follow dynamics of entire plankton communities  
101in a single analysis.

102Bacterial OTUs of the genera *Arcicella* and *Variovorax* were major  
103representatives of the bacterial "bloom" that dominated the lake in June.

104*Arcicella* was more abundant in the upper water layers and potentially

105colonized the water from the neuston, whereas *Variovorax* was more abundant  
106above the sediment suggesting colonization from the sediment (Fig. 1b, c).  
107Interestingly, *Arcicella* was rare in April and May (<0.2%). There are few reports  
108of blooms of rare bacterial taxa (e.g., Gilbert et al., 2012) and causes for single  
109taxa bacterial blooms are often connected to phytoplankton events (Bizic-  
110Ionescu et al. 2014). *Arcicella* re-occurred the following year (Fig. 2) and we  
111were able to relate its appearance to the phyto- and zooplankton dynamics  
112(SI1). In contrast to the *Vibrio* sp. bloom described by Gilbert *et al.* (2012), our  
113*Arcicella* OTU can be classified as conditional/recurrent rare taxa (Lynch and  
114Neufeld, 2015). Searching through existing freshwater data sets, we found  
115*Arcicella* to be a prevalent freshwater lineage on a global scale, especially in  
116lotic ecosystems. *Arcicella* was reported as the second most abundant OTU  
117(6.8%) in all large circumpolar streams (Crump *et al.*, 2009). In other studies,  
118*Arcicella* was detected but not explicitly reported. For example, a single  
119*Arcicella* OTU was among the dominant taxa in the Danube River, comprising  
1202%  $\pm$  2% (Savio pers. comm.; Savio *et al.*, 2015) and a single *Arcicella* OTU  
121reached 12  $\pm$  4% in a small turbid glacial lake (Peter pers. comm.; Peter and  
122Sommaruga, 2016). Despite those previous appearances, their autecology has  
123never been discussed, suggesting that we have probably revealed a thus far  
124unrecognized major freshwater lineage.

125

126Using universal metabarcoding we could monitor major changes in freshwater  
127pico- to mesoplankton with a single water sample analysis. Changes in relative  
128abundance of OTUs matched the seasonal dynamics that have previously been  
129reported for this lake. The discovery of a conditionally rare taxon supports the  
130observed plankton dynamics for the bacterioplankton, since such taxa are of a

131disproportional significance for the overall community dynamics (Shade *et al.*,  
1322014). Integrative analysis may help to answer broader ecological questions  
133related to the role of keystone species, ecosystem resilience and resistance,  
134and cross-domain interactions of species (Lima-Mendez *et al.*, 2015). Universal  
135metabarcoding represents a valuable means of studying plankton dynamics in  
136aquatic systems and shows promise for long-term monitoring.

137

### 138**Acknowledgements**

139We would like to thank Uta Mallock for chemical analysis, Susan Mbedi for  
140assistance in sequencing and Marie Jeschek for assistance in data processing.

141This is publication #027 of the Berlin Center for Genomics in Biodiversity

142Research. Financial support was provided by two projects of the Pact for

143Innovation and Research of the Gottfried Wilhelm Leibniz Association “Terralac”

144and “TEMBI”. R. Tischbier (Stiftung Pro Artenvielfalt) kindly provided access to

145the lake.

146

### 147**Conflict of interest**

148The authors declare no conflict of interest.

149

150Supplementary information is available

151

152

### 153**References**

154Barberán A, Casamayor EO, Fierer N. (2014). The microbial contribution to

155macroecology. *Front Microbiol* 5: 203.

156Bižić-Ionescu M, Amann R, Grossart, HP. (2014). Massive regime shifts and high

157activity of heterotrophic bacteria in an ice-covered lake. *PloS one* 9(11):

158e113611.

159Brothers SM, Hilt S, Attermeyer K, Grossart HP, Kosten S, Lischke B, Mehner T,

160Meyer N, Scharnweber K, Köhler J. (2013). A regime shift from macrophyte to

161phytoplankton dominance enhances carbon burial in a shallow, eutrophic lake.

162*Ecosphere* 4(11): 137. <http://dx.doi.org/10.1890/ES13-00247.1>

163Crump BC, Peterson BJ, Raymond P, Amon RM, Rinehart A, McClelland JW,

164Holmes RM. (2009). Circumpolar synchrony in big river bacterioplankton. *Proc*

165*Natl Acad Sci* 106(50): 21208-21212.

166Engelbrekton A, Kunin V, Wrighton KC, Zvenigorodsky N, Chen F, Ochman H,

167Hugenholtz P. (2010). Experimental factors affecting PCR-based estimates of

168microbial species richness and evenness. *ISME J* 4(5): 642-647.

169Fuhrman JA, Cram JA, Needham DM. (2015). Marine microbial community

170dynamics and their ecological interpretation. *Nat Rev Microbiol* 13(3): 133-146.

171Gies EA, Konwar KM, Beatty JT, Hallam SJ. (2014). Illuminating microbial dark

172matter in meromictic Sakinaw Lake. *Appl Environ Microbiol* 80(21): 6807-6818.

173Gilbert JA, Steele JA, Caporaso JG, Steinbrück L, Reeder J, Temperton B et al.

174(2012). Defining seasonal marine microbial community dynamics. *ISME J* 6:

175298–308.

176Hilt S, Wanke T, Scharnweber K, Brauns M, Syväranta J, Brothers S et al. (2015).

177Contrasting response of two shallow eutrophic cold temperate lakes to a partial

178winterkill of fish. *Hydrobiologia* 749: 31-42.

179Hölker F, Wurzbacher C, Weißenborn C, Monaghan MT, Holzhauer SI, Premke K.

180(2015). Microbial diversity and community respiration in freshwater sediments

181influenced by artificial light at night. *Philos T Roy Soc B* 370(1667): 20140130.

182Lima-Mendez G, Faust K, Henry N, Decelle J, Colin S, Carcillo F. et al. (2015).

183Determinants of community structure in the global plankton interactome.

184*Science* 348(6237): 1262073.

185Lischke B, Weithoff G, Wickham SA, Attermeyer K, Grossart HP, Scharnweber K  
186et al. (2016). Large biomass of small feeders: ciliates may dominate herbivory  
187in eutrophic lakes. *J Plankton Res* 38(1): 2–15.

188Parada AE, Needham DM, Fuhrman JA. (2015). Every base matters: assessing  
189small subunit rRNA primers for marine microbiomes with mock communities,  
190time series and global field samples. *Environ Microbiol* doi: 10.1111/1462-  
1912920.13023.

192Peter H, Sommaruga R. (2016). Shifts in diversity and function of lake bacterial  
193communities upon glacier retreat. *ISME J* doi: 10.1038/ismej.2015.245

194Pruesse E, Peplies J, Glöckner FO. (2012). SINA: accurate high-throughput  
195multiple sequence alignment of ribosomal RNA genes. *Bioinformatics* 28(14):  
1961823-1829.

197Savio D, Sinclair L, Ijaz UZ, Parajka J, Reischer GH, Stadler P, et al. (2015).

198Bacterial diversity along a 2600 km river continuum. *Environ Microbiol* 17(12):  
1994994-5007.

200Schloss PD, Westcott SL, Ryabin T, Hall JR, Hartmann M, Hollister EB, et al.

201(2009). Introducing mothur: open-source, platform-independent, community-  
202supported software for describing and comparing microbial communities. *Appl*  
203*Environ Microbiol* 75(23): 7537-7541.

204Shade A, Caporaso JG, Handelsman J, Knight R, Fierer N. (2013). A meta-  
205analysis of changes in bacterial and archaeal communities with time. *ISME J*  
2067(8): 1493-1506.

207Shade A, Jones SE, Caporaso JG, Handelsman J, Knight R, Fierer N, Gilbert JA.  
208(2014). Conditionally rare taxa disproportionately contribute to temporal



209changes in microbial diversity. *MBio* 5(4): e01371-14.

210Steele JA, Countway PD, Xia L, Vigil PD, Beman JM, Kim DY, et al. (2011). Marine  
211bacterial, archaeal and protistan association networks reveal ecological  
212linkages. *ISME J* 5(9): 1414-1425.

## 213 **Figure Legends**

214

215 **Figure 1.** Spatial and temporal changes of microorganisms in Lake Gollin from  
216 three samplings (April, May, June) and locations (littoral, pelagic, and above  
217 sediment) displaying abundances (mean  $\pm$  standard deviation) based on a  
218 rarefied OTU matrix (1744 reads/sample) of (a) all three domains with a total of  
219 1307 bacteria, 388 eukaryote, and 190 archaea OTUs in the dataset; (b) the  
220 dominant *Arcicella* OTU; (c) the dominant *Variovorax* OTU and (d) the sum of all  
221 ciliate OTUs (70 OTUs).

222

223 **Figure 2.** Seasonal appearance of *Arcicella* assessed via a PCR assay and  
224 evaluated based on the band intensity in four categories: 0 = no product, 1 =  
225 very weak product, 2 = weak product, 3 = medium product, 4 = strong  
226 product. *Arcicella* exhibited pronounced maxima and minima over the course of  
227 the 2 years and appeared in the particle-attached ( $> 5 \mu\text{m}$ ) and free-living  
228 fraction (0.2 - 5  $\mu\text{m}$ ).

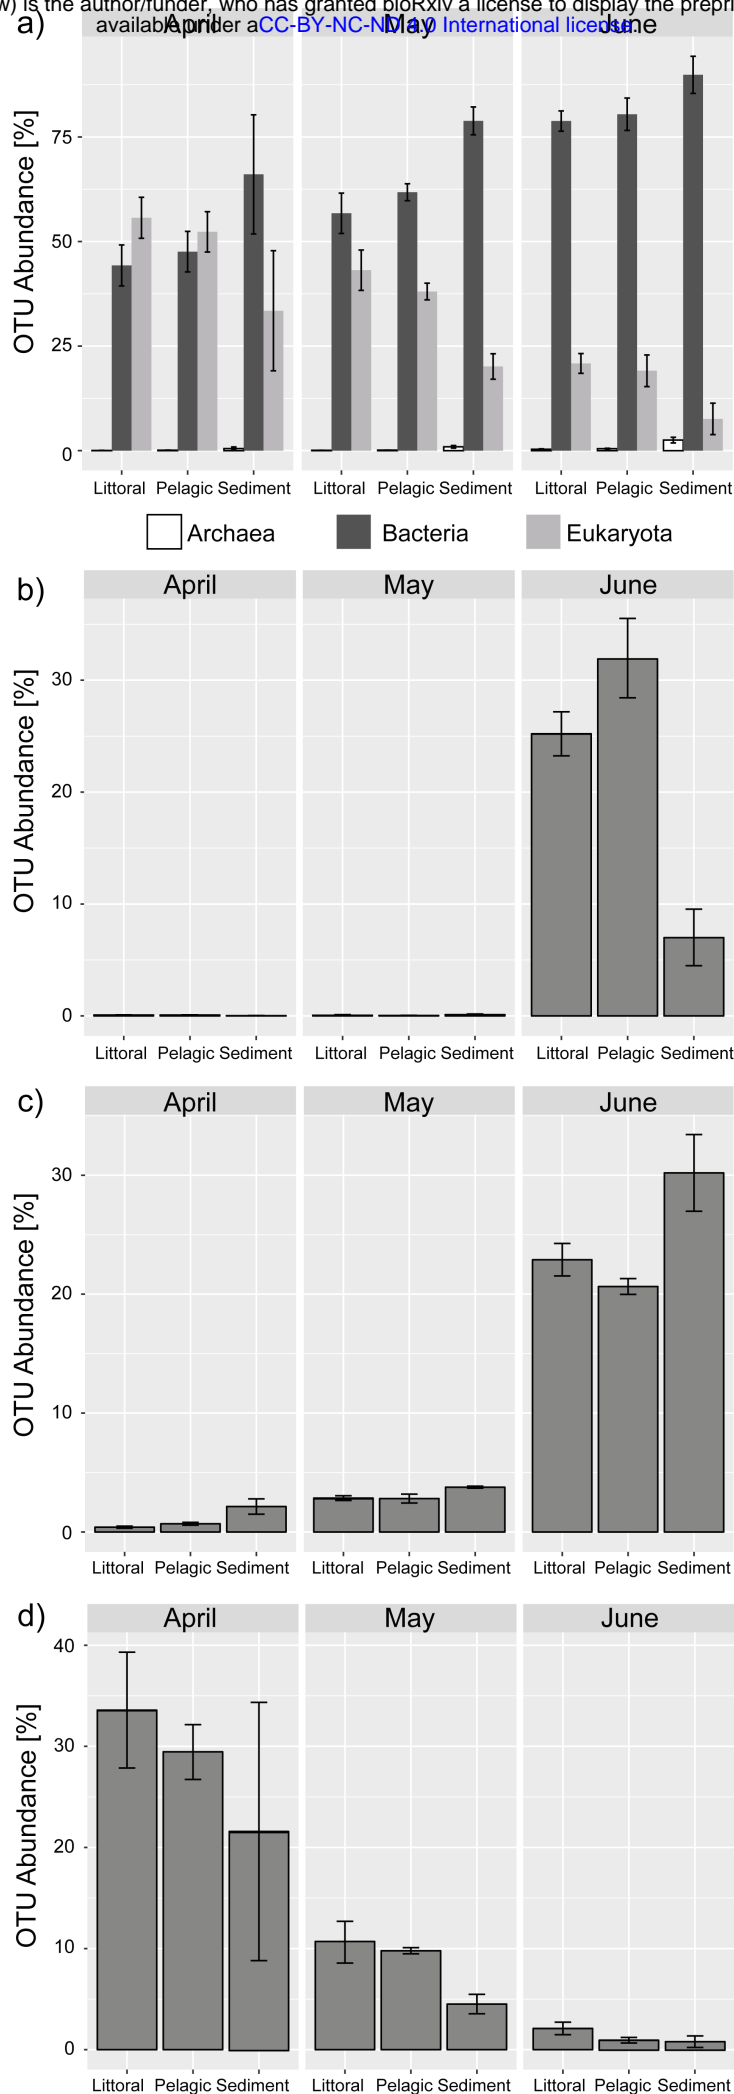

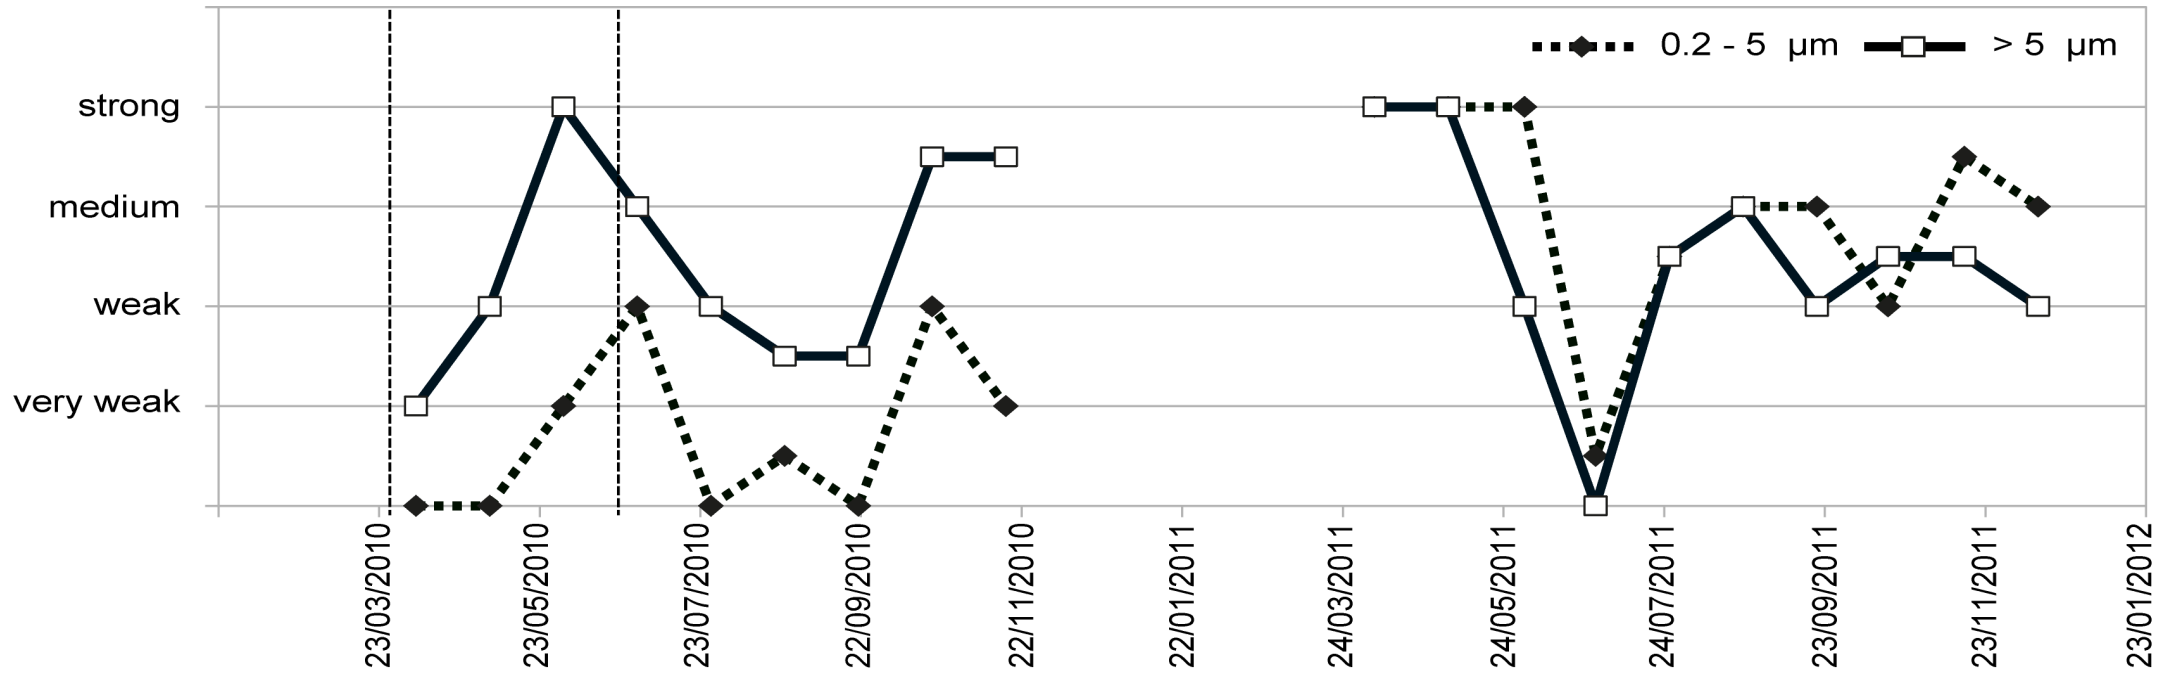

Source: http://biorxiv.org/content/10.1101/058628v1.full.pdf
